# Supplementary material for: Metal-doped niobate pyrochlores and double-perovskites for glycerol valorization: structural and electronic properties and DFT calculations
Source: Royal Society of Chemistry journal article supplement (doi:10.1039/d4dt00898g), 2024-01-01
Supplement: d4dt00898g1.pdf [file d4dt00898g1.pdf]

ARTICLE

## Metal-doped niobate pyrochlores and double-perovskites for glycerol valorization: Structural and electronic properties and DFT calculations

Received 00th January 20xx,  
Accepted 00th January 20xx

DOI: 10.1039/x0xx00000x

Gabriela Mota Bertoldo<sup>a</sup>, Alcineia Conceição Oliveira<sup>a\*</sup>, Gilberto Dantas Saraiva<sup>b</sup>, Rai Jucá<sup>c</sup>, José Gadelha da Silva Filho<sup>b</sup>, Elena Rodríguez-Aguado<sup>d</sup>, José Jiménez-Jiménez<sup>d</sup> and Enrique Rodríguez-Castellón<sup>d</sup>

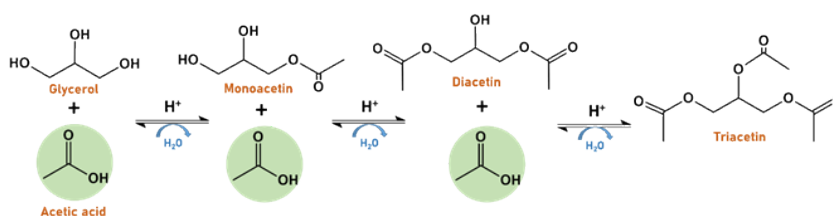

Fig.S<sub>1</sub>. Schematic representation of the esterification of glycerol with acetic acid reaction

<sup>a</sup> Universidade Federal do Ceará, Campus do Pici-Bloco 940, Departamento de Química Analítica e Físico-Química, Fortaleza, Ceará, Brazil. \*Email: alcineia@ufc.br

<sup>b</sup> Faculdade de Educação Ciências e Letras do Sertão Central, Universidade Estadual do Ceará, Quixadá, Ceará, Brazil.

<sup>c</sup> Departamento de Física, Universidade Federal de Sergipe, São Cristóvão 49100-000, Sergipe, Brazil.

<sup>d</sup> Departamento de Química Inorgánica, Facultad de Ciencias, Universidad de Málaga, 29071 Málaga, Spain.

† Footnotes relating to the title and/or authors should appear here.

Electronic Supplementary Information (ESI) available: [details of any supplementary information available should be included here]. See DOI: 10.1039/x0xx00000x

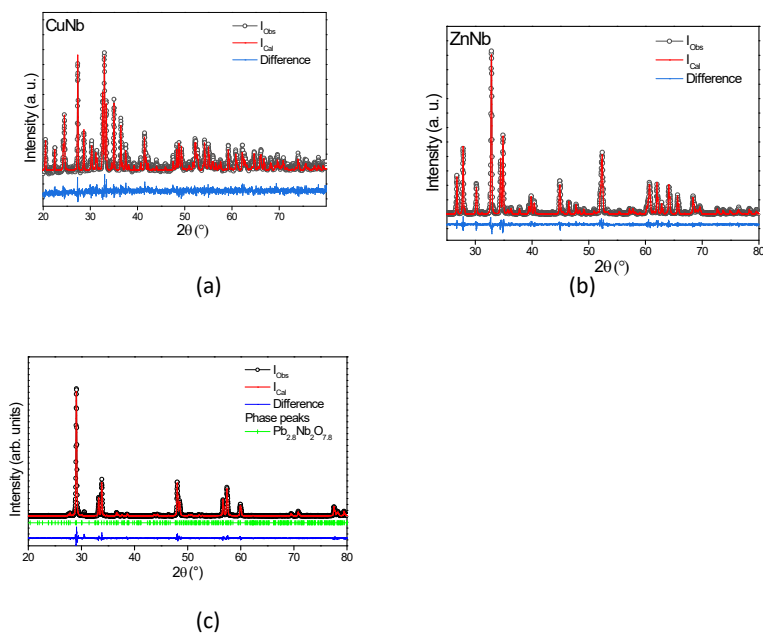

**Fig.S2.** Experimental XRD pattern of the (a) CuNb (b) ZnNb and (c) PbNb pyrochlores in black balls. The Rietveld refinement-simulated pattern is in the solid red line. The difference between experimental and calculated XRD patterns are in blue line at the bottom of the figures.

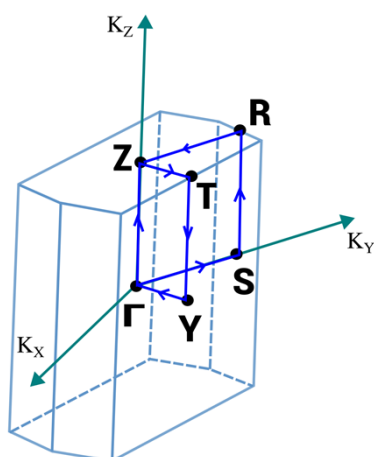

**Fig.S<sub>3</sub>**. The first Brillouin zone of the primitive cell with the six high-symmetry points used in this study:  $G(0,0,0)$ ,  $Z(0,0,1/2)$ ,  $T(1/2,1/2,1/2)$ ,  $Y(1/2,1/2,0)$ ,  $S(0,1/2,0)$  and  $R(0,1/2,1/2)$ .

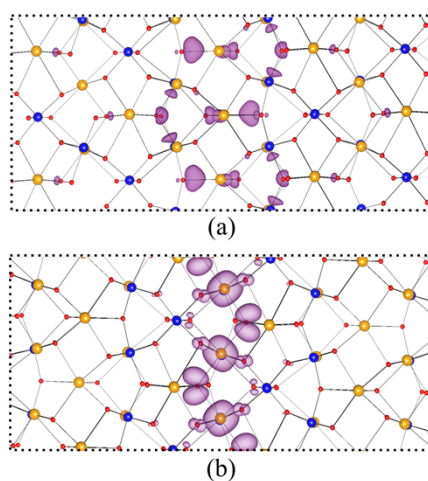

**Fig.S<sub>4</sub>**. Wavefunction of the (a) conduction band minimum (CBM) and (b) valence band maximum (VBM) obtained using the PBE functional for the  $Pb_{2.8}Nb_2O_{7.8}$  structure.



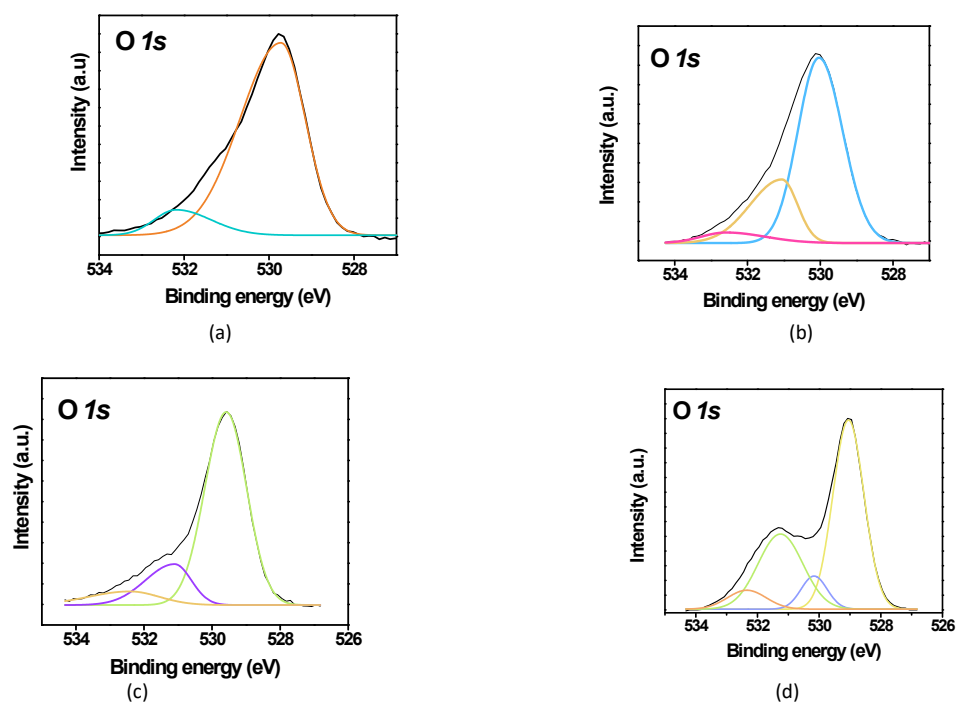

Fig.S<sub>7</sub>. O 1s core level spectra of the samples: (a) CuNb, (b) ZnNb, (c)PbNb and (d) LaFeMn.

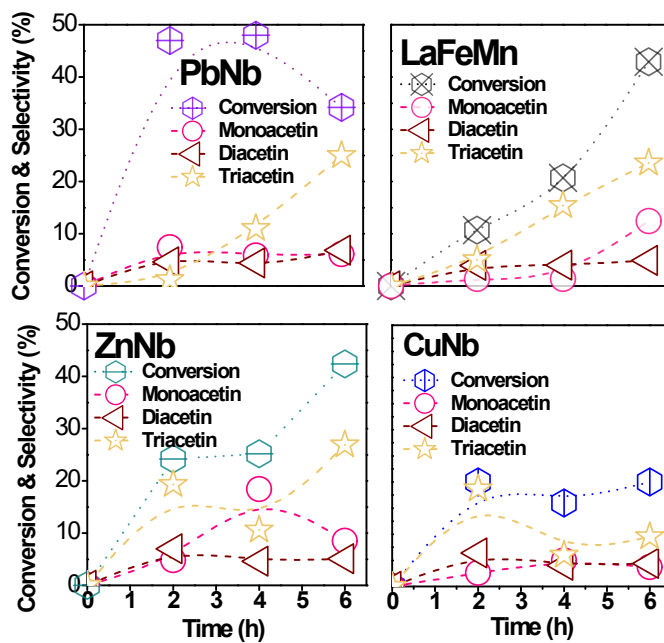

Fig.S<sub>8</sub>. Conversion and selectivity of the products in function of the time.

The values obtained for the Rietveld refinement quality factors  $R_{wp}$ ,  $R_p$ , and  $\chi^2$  are shown in Table S<sub>1</sub>.

**Table S<sub>1</sub>:** Structural parameters and quality factors of PbNb sample obtained by Rietveld refinement

| <b>Pb<sub>2.8</sub>Nb<sub>2</sub>O<sub>7.8</sub></b> |         |
|------------------------------------------------------|---------|
| a (Å)                                                | 7.5200  |
| b (Å)                                                | 32.5130 |
| <b>Lattice parameters</b>                            |         |
| c (Å)                                                | 7.5420  |
| $\alpha$ (°)                                         | 90.00   |
| $\beta$ (°)                                          | 90.00   |
| $\gamma$ (°)                                         | 90.00   |
| $\chi^2$                                             | 1.40    |
| <b>Quality factors</b>                               |         |
| $R_{wp}$ (%)                                         | 23.01   |

The curve fitting of XRD patterns and the Rietveld refinement lattice parameters are in accordance. The quality factors *i.e.*,  $R_p$  and  $R_{wp}$  discrepancy factors are all below 20%. The atomic coordinates are contained in the supplementary material in Table S<sub>2</sub>.

The crystal structure of Pb<sub>2.8</sub>Nb<sub>2</sub>O<sub>7.8</sub> is composed of NbO<sub>6</sub> octahedrons, which are interconnected by sharing corners to create an intricate network of intersecting structural channels. This arrangement can be visualized in Fig. 2 (b), which displays the distribution and organization of the niobium octahedrons along the *c* and *a* directions. Those channels are occupied by Pb1 and Pb5 cations, which are bonded to eight oxygen atoms and can also be represented as distorted dodecahedrons. Meanwhile, the Pb4 atoms present irregular coordination with six oxygen atoms due to the displacement of NbO<sub>6</sub> packets from neighboring layers.

**Table S<sub>2</sub>.** Refined atomic position parameters of Pb<sub>2.8</sub>Nb<sub>2</sub>O<sub>7.8</sub> structure.

| Atom | Ion  | x       | y       | z       | Site |
|------|------|---------|---------|---------|------|
| Pb1  | Pb2+ | 0.00000 | 0.50153 | 0.00440 | 4a   |
| Pb2  | Pb2+ | 0.00000 | 0.16858 | 0.50510 | 4a   |
| Pb3  | Pb2+ | 0.00000 | 0.83030 | 0.48650 | 4a   |
| Pb4  | Pb2+ | 0.24980 | 0.24497 | 0.25000 | 8b   |
| Pb5  | Pb2+ | 0.24690 | 0.41692 | 0.25430 | 8b   |
| Nb1  | Nb5+ | 0.00000 | 0.99827 | 0.00300 | 4a   |
| Nb2  | Nb5+ | 0.00000 | 0.33339 | 0.49920 | 4a   |
| Nb3  | Nb5+ | 0.00000 | 0.66417 | 0.50410 | 4a   |
| Nb4  | Nb5+ | 0.24990 | 0.08283 | 0.24880 | 8b   |
| O1   | O2-  | 0.18200 | 0.04150 | 0.07000 | 8b   |
| O2   | O2-  | 0.30800 | 0.12010 | 0.06800 | 8b   |
| O3   | O2-  | 0.18700 | 0.29820 | 0.06500 | 8b   |
| O4   | O2-  | 0.80600 | 0.96120 | 0.94700 | 8b   |
| O5   | O2-  | 0.69100 | 0.88020 | 0.94900 | 8b   |
| O6   | O2-  | 0.81100 | 0.69980 | 0.96200 | 8b   |
| O7   | O2-  | 0.00000 | 0.10020 | 0.25600 | 4a   |
| O8   | O2-  | 0.00000 | 0.35980 | 0.25300 | 4a   |
| O9   | O2-  | 0.00000 | 0.55900 | 0.25600 | 4a   |
| O10  | O2-  | 0.00000 | 0.68040 | 0.26100 | 4a   |
| O11  | O2-  | 0.00000 | 0.97780 | 0.26500 | 4a   |
| O12  | O2-  | 0.00000 | 0.77820 | 0.25300 | 4a   |
| O13  | O2-  | 0.00000 | 0.46760 | 0.25100 | 4a   |
| O14  | O2-  | 0.00000 | 0.87010 | 0.25400 | 4a   |

The last two lead atoms Pb2 and Pb3 are found inside the pyrochlore stacks, surrounded by seven oxygen atoms; six of them form the typical deformed chair-of-six ring, and one sits at the tip of the polyhedron. This leads to Pb<sup>2+</sup> and Nb<sup>5+</sup> ions being in different positions within the unit cell, as shown in Fig. 2 (c). There are three distinct sites for Pb, located at positions 4a (Pb1, Pb2 and Pb3) and two at positions 8b (Pb4 and Pb5). Nb<sup>5+</sup> ions also occupy distinct

sites, with three at positions 4a (Nb1, Nb2 and Nb3) and one at the 8b site (Nb5).

The PbO impurity phase arises from the incomplete reaction in the formation process, from the  $\text{Pb}_3\text{Nb}_2\text{O}_8$ , following the following stoichiometric relationship:  $\text{Pb}_3\text{Nb}_2\text{O}_8 = \text{Pb}_{2.8}\text{Nb}_2\text{O}_{7.8} + \text{Pb}_{0.2}\text{O}_{0.2}$ . This explains the non-stoichiometric character of  $\text{Pb}_{2.8}\text{Nb}_2\text{O}_{7.8}$ .

Table S<sub>3</sub> compares the lattice parameters of the PbNb sample. The results show that LDA functional yields lattice parameters on average is 16 % smaller than those observed experimentally. This suggests that the LDA functional may underestimate the crystal's structural dimensions. Meanwhile, the simulation performed with the GGA functional yields lattice parameter values of around 7.54, 32.83, and 7.61 angstroms, for *a*, *b*, and *c*, respectively. These values are, on average, 2.4% higher than the experimental values.

**Table S<sub>3</sub>:** Comparison of lattice parameters obtained from XRD, DFT-LDA and DFT-GGA for the  $\text{Pb}_{2.8}\text{Nb}_2\text{O}_{7.8}$  system.

| Lattice parameter | XRD    | DFT-LDA | DFT-GGA |
|-------------------|--------|---------|---------|
| <i>a</i> (Å)      | 7.520  | 7.390   | 7.547   |
| <i>b</i> (Å)      | 32.513 | 32.007  | 32.830  |
| <i>c</i> (Å)      | 7.542  | 7.421   | 7.613   |

To further explore the crystal structural properties, the covalent bond lengths and angles are provided in Tables S<sub>5</sub> and S<sub>6</sub>, respectively. As one can see, we observed varying values of bond lengths and bond angles for interactions of the same type. In fact, this happens because neighbouring niobium atoms share coordinating oxygen atoms leading to different values on those structural parameters. In general, our calculated structural parameters are in the acceptable range compared with the experimental ones. The greatest deviations were found for the Nb2-O6, Pb1-O13 and Pb4-O6 bond lengths in the *ab* plane (~ 5 – 13 %) for both GGA and LDA simulations (see Table S<sub>5</sub>). The Nb2-O6

interactions stabilize the channels externally in the *ab* plane, while the Pb1-O13 interactions restrict the channel size. Therefore, our simulated structures show a slight increase in the radius of the channels parallel to the *c*-axis since the simulated lengths are, on average, higher than experimental values. On the other hand, Pb4-O6 interactions limit the distances between the NbO<sub>6</sub> octahedrons along the *b*-axis. In this case, the distances are smaller than the experimentally verified ones, indicating that the distances between the layers of niobium octahedrons are slightly smaller in the simulations carried out with both GGA and LDA.

Another important structural aspect are the bond angles formed between the atomic interactions of the crystal. Table S<sub>6</sub> provides a comprehensive comparison of the primary angles observed in the material. Notably, the internal angles of the NbO<sub>6</sub> octahedrons exhibit excellent agreement, with relative deviations below 8%. For example, we observed a reduction of approximately 6% in the equatorial connection angles of the simulated NbO<sub>6</sub> octahedrons (both LDA and GGA) relative to the experimental data. In particular, the transverse bond angle of Nb1O<sub>6</sub> octahedrons exhibits a maximum deviation of 7.9% from the experimental value in GGA simulations. A similar result is observed for the bond angles O-Pb-O and Pb-O-Nb, with maximum deviations around 8.7% and 7%, respectively. The limitations of the LDA and GGA approximations, such as neglecting non-local exchange-correlation effects, can contribute to the observed deviations in the calculated structural parameters. However, based on the comparison between the calculated structural parameters using the LDA and GGA approximations and the corresponding experimental values, it can be inferred that both methods have provided acceptable structural data and can be used to investigate the vibrational and electronic properties of  $\text{Pb}_{2.8}\text{Nb}_2\text{O}_{7.8}$  crystal.

**Table S4.** Binding and surface atomic ratios determined by XPS analyses.

| Sample | Nb<br>3d | Cu<br>2p | O<br>1s | C<br>1s | Zn<br>2p | Pb<br>4f | Mn<br>2p | La<br>3d | Fe<br>2p | Nb/Me<br>ratio | La/Fe<br>ratio | La/Mn<br>ratio |
|--------|----------|----------|---------|---------|----------|----------|----------|----------|----------|----------------|----------------|----------------|
| CuNb   | 206.2    | 934.0    | 529.8   | 284.2   | -        | -        | -        | -        | -        | 1.1            | -              | -              |
|        | 209.1    | 936.3    | 531.4   | 286.0   |          |          |          |          |          |                |                |                |
|        |          | 940.6    |         | 288.7   |          |          |          |          |          |                |                |                |
|        |          | 956.8    |         |         |          |          |          |          |          |                |                |                |
| ZnNb   | 206.8    | -        | 530.0   | 284.7   | 1021.6   | -        | -        | -        | -        | 0.89           | -              | -              |
|        | 209.2    |          | 531.0   | 285.8   |          |          |          |          |          |                |                |                |
|        |          |          | 532.2   | 288.5   |          |          |          |          |          |                |                |                |
| PbNb   | 206.4    | -        | 529.6   | 284.4   | -        | 138.0    | -        | -        | -        | 0.47           | -              | -              |
|        | 209.1    |          | 531.1   | 285.7   |          | 143.0    |          |          |          |                |                |                |
|        |          |          | 532.3   | 288.7   |          |          |          |          |          |                |                |                |
| LaFeMn | -        | -        | 529.0   | 284.8   | -        | -        | 640.9    | 833.6    | 709.9    | -              | 1.9            | 4.4            |
|        |          |          | 530.4   | 286.0   |          |          | 643.1    | 837.7    | 724.1    |                |                |                |
|        |          |          | 531.5   | 288.9   |          |          | 652.8    | 850.5    |          |                |                |                |
|        |          |          | 532.6   |         |          |          | 656.3    | 854.8    |          |                |                |                |



**Table S<sub>5</sub>.** Comparison of bond lengths obtained from XRD, DFT-LDA and DFT-GGA for the Pb<sub>2.8</sub>Nb<sub>2</sub>O<sub>7.8</sub> system.

| Atoms   | XRD              | DFT – LDA        |       | DFT – GGA        |       | Atoms   | XRD              | DFT – LDA        |        | DFT – GGA        |        |
|---------|------------------|------------------|-------|------------------|-------|---------|------------------|------------------|--------|------------------|--------|
|         | Bond lengths (Å) | Bond lengths (Å) | Δ (%) | Bond lengths (Å) | Δ (%) |         | Bond lengths (Å) | Bond lengths (Å) | Δ (%)  | Bond lengths (Å) | Δ (%)  |
| Nb1–O1  | 2.026            | 1.963            | -3.10 | 2.013            | -0.65 | Pb2–O12 | 2.548            | 2.456            | -3.60  | 2.541            | -0.27  |
| Nb1–O11 | 2.085            | 1.980            | -5.06 | 2.189            | 4.98  | Pb2–O14 | 2.260            | 2.187            | -3.23  | 2.227            | -1.42  |
| Nb1–O11 | 1.956            | 1.986            | 1.49  | 1.893            | -3.24 | Pb2–O3  | 2.629            | 2.519            | -4.18  | 2.594            | -1.32  |
| Nb1–O4  | 1.939            | 1.963            | 1.23  | 1.970            | 1.58  | Pb2–O5  | 2.845            | 2.837            | -0.29  | 2.895            | 1.77   |
| Nb2–O10 | 2.025            | 1.954            | -3.48 | 2.036            | 0.55  | Pb2–O7  | 2.911            | 2.967            | 1.94   | 2.976            | 2.23   |
| Nb2–O2  | 2.154            | 2.051            | -4.80 | 2.113            | -1.93 | Pb3–O12 | 2.444            | 2.457            | 0.56   | 2.525            | 3.31   |
| Nb2–O6  | 1.806            | 1.890            | 4.63  | 1.897            | 5.04  | Pb3–O14 | 2.179            | 2.186            | 0.33   | 2.227            | 2.17   |
| Nb2–O8  | 2.046            | 1.996            | -2.42 | 1.973            | -3.55 | Pb3–O2  | 2.888            | 2.836            | -1.81  | 2.884            | -0.15  |
| Nb3–O10 | 1.908            | 1.953            | 2.36  | 1.910            | 0.10  | Pb3–O6  | 2.542            | 2.519            | -0.89  | 2.606            | 2.50   |
| Nb3–O3  | 1.920            | 1.890            | -1.55 | 1.909            | -0.54 | Pb3–O7  | 3.039            | 2.965            | -2.45  | 3.017            | -0.72  |
| Nb3–O5  | 2.078            | 2.051            | -1.30 | 2.102            | 1.16  | Pb4–O10 | 2.820            | 2.762            | -2.07  | 2.937            | 4.14   |
| Nb3–O8  | 2.033            | 1.998            | -1.72 | 2.120            | 4.28  | Pb4–O12 | 2.170            | 2.171            | 0.06   | 2.197            | 1.24   |
| Nb4–O1  | 1.971            | 2.013            | 2.11  | 1.993            | 1.12  | Pb4–O3  | 2.273            | 2.303            | 1.32   | 2.341            | 3.01   |
| Nb4–O2  | 1.876            | 1.927            | 2.72  | 1.915            | 2.08  | Pb4–O3  | 2.800            | 2.614            | -6.64  | 2.754            | -1.63  |
| Nb4–O4  | 2.112            | 2.014            | -4.65 | 2.114            | 0.08  | Pb4–O6  | 2.662            | 2.303            | -13.49 | 2.372            | -10.90 |
| Nb4–O5  | 1.980            | 1.927            | -2.68 | 1.986            | 0.27  | Pb4–O6  | 2.448            | 2.614            | 6.81   | 2.712            | 10.79  |
| Nb4–O7  | 1.963            | 1.937            | -1.34 | 1.976            | 0.68  | Pb5–O1  | 2.790            | 2.732            | -2.08  | 3.030            | 8.60   |
| Nb4–O9  | 2.035            | 1.997            | -1.84 | 2.031            | -0.20 | Pb5–O11 | 2.747            | 2.692            | -1.99  | 2.752            | 0.18   |
| Pb1–O1  | 2.766            | 2.652            | -4.15 | 2.713            | -1.94 | Pb5–O13 | 2.483            | 2.303            | -7.25  | 2.338            | -5.81  |
| Pb1–O13 | 2.162            | 2.296            | 6.20  | 2.348            | 8.58  | Pb5–O14 | 2.437            | 2.412            | -1.03  | 2.461            | 0.96   |
| Pb1–O13 | 2.159            | 2.297            | 6.41  | 2.354            | 9.05  | Pb5–O2  | 2.686            | 2.611            | -2.80  | 2.833            | 5.44   |
| Pb1–O4  | 2.684            | 2.656            | -1.05 | 2.746            | 2.34  | Pb5–O4  | 2.764            | 2.723            | -1.50  | 2.633            | -4.77  |
| Pb1–O9  | 2.663            | 2.638            | -0.96 | 2.682            | 0.71  | Pb5–O5  | 2.628            | 2.607            | -0.77  | 2.535            | -3.52  |
| Pb1–O9  | 2.717            | 2.631            | -3.18 | 2.735            | 0.67  | Pb5–O8  | 2.626            | 2.587            | -1.50  | 2.669            | 1.62   |

**Table S<sub>6</sub>.** Comparison of bond angles obtained from XRD, DFT-LDA and DFT-GGA for the Pb<sub>2.8</sub>Nb<sub>2</sub>O<sub>7.8</sub> system.

| Atoms       | XRD      | DFT-LDA  |       | DFT-GGA  |       | Atoms       | XRD      | DFT-LDA  |       | DFT-GGA  |       |
|-------------|----------|----------|-------|----------|-------|-------------|----------|----------|-------|----------|-------|
|             | Angle(°) | Angle(°) | Δ(%)  | Angle(°) | Δ(%)  |             | Angle(°) | Angle(°) | Δ(%)  | Angle(°) | Δ(%)  |
| Nb1-O1-Pb1  | 102.330  | 105.430  | 3.03  | 105.100  | 2.71  | O11-Pb5-O1  | 59.540   | 61.360   | 3.06  | 58.780   | -1.28 |
| Nb1-O1-Pb5  | 104.640  | 104.250  | -0.37 | 97.300   | -7.01 | O11-Pb5-O13 | 92.310   | 97.100   | 5.19  | 97.230   | 5.33  |
| Nb1-O11-Nb1 | 137.950  | 138.730  | 0.57  | 137.530  | -0.30 | O11-Pb5-O14 | 84.780   | 88.690   | 4.61  | 87.050   | 2.68  |
| Nb1-O11-Pb5 | 101.660  | 104.980  | 3.27  | 100.300  | -1.34 | O11-Pb5-O2  | 113.790  | 117.040  | 2.86  | 110.950  | -2.50 |
| Nb1-O11-Pb5 | 108.270  | 104.980  | -3.04 | 100.300  | -7.36 | O11-Pb5-O8  | 178.160  | 175.880  | -1.28 | 172.450  | -3.20 |
| Nb1-O4-Nb4  | 136.490  | 139.640  | 2.31  | 135.480  | -0.74 | O12-Pb2-O14 | 76.600   | 75.900   | -0.91 | 75.190   | -1.84 |
| Nb2-O10-Pb4 | 97.820   | 100.580  | 2.82  | 99.770   | 1.99  | O12-Pb3-O14 | 80.310   | 75.870   | -5.53 | 75.540   | -5.94 |
| Nb2-O2-Pb3  | 95.410   | 97.130   | 1.80  | 96.960   | 1.62  | O12-Pb3-O2  | 122.710  | 120.140  | -2.09 | 121.000  | -1.39 |
| Nb2-O2-Pb5  | 101.850  | 103.960  | 2.07  | 99.420   | -2.39 | O12-Pb3-O6  | 71.380   | 68.440   | -4.12 | 68.660   | -3.81 |
| Nb2-O6-Pb3  | 118.860  | 113.340  | -4.64 | 113.040  | -4.90 | O12-Pb3-O7  | 175.860  | 171.820  | -2.30 | 174.410  | -0.82 |
| Nb2-O6-Pb4  | 133.370  | 133.371  | 0.00  | 134.090  | 0.54  | O12-Pb4-O3  | 95.370   | 95.030   | -0.36 | 95.910   | 0.57  |
| Nb2-O6-Pb4  | 109.810  | 107.810  | -1.82 | 111.969  | 1.971 | O12-Pb4-O6  | 77.870   | 77.400   | -0.60 | 78.500   | 0.81  |
| Nb2-O8-Nb3  | 132.640  | 131.340  | -0.98 | 134.630  | 1.50  | O13-Pb1-O1  | 94.920   | 98.530   | 3.80  | 96.290   | 1.44  |
| Nb2-O8-Pb5  | 107.060  | 106.490  | -0.53 | 109.020  | 1.83  | O13-Pb1-O1  | 86.560   | 81.510   | -5.83 | 84.978   | -1.83 |
| Nb3-O10-Nb2 | 151.150  | 150.900  | -0.17 | 152.940  | 1.18  | Nb3-O5-Nb4  | 136.810  | 138.950  | 1.56  | 136.440  | -0.27 |
| Nb3-O10-Pb4 | 103.540  | 100.570  | -2.87 | 100.670  | -2.77 | Nb3-O8-Pb5  | 105.940  | 106.420  | 0.45  | 102.370  | -3.37 |
| Nb3-O3-Pb4  | 103.930  | 107.750  | 3.68  | 107.260  | 3.20  | Nb4-O1-Nb1  | 144.950  | 139.870  | -3.50 | 146.610  | 1.15  |
| O11-Nb1-O1  | 87.300   | 90.780   | 3.99  | 84.340   | -3.39 | Nb4-O1-Pb1  | 102.630  | 104.980  | 2.29  | 104.580  | 1.90  |
| O11-Nb1-O11 | 175.180  | 180.000  | 2.75  | 177.050  | 1.07  | Nb4-O1-Pb5  | 101.770  | 101.930  | 0.16  | 100.240  | -1.50 |
| O11-Nb1-O4  | 90.460   | 88.960   | -1.66 | 85.390   | -5.60 | Nb4-O2-Nb2  | 141.690  | 139.030  | -1.88 | 142.950  | 0.89  |
| O11-Nb1-O4  | 92.710   | 88.960   | -4.04 | 85.390   | -7.90 | Nb4-O2-Pb3  | 109.180  | 107.470  | -1.57 | 107.630  | -1.42 |

Table S<sub>6</sub>. Cont.

| Atoms       | XRD      | DFT-LDA  |       | DFT-GGA  |       | Atoms       | XRD      | DFT-LDA  |       | DFT-GGA  |       |
|-------------|----------|----------|-------|----------|-------|-------------|----------|----------|-------|----------|-------|
|             | Angle(°) | Angle(°) | Δ(%)  | Angle(°) | Δ(%)  |             | Angle(°) | Angle(°) | Δ(%)  | Angle(°) | Δ(%)  |
| Nb4-O2-Pb5  | 108.360  | 108.870  | 0.47  | 109.420  | 0.98  | O2-Nb2-O2   | 84.170   | 86.800   | 3.12  | 85.020   | 1.01  |
| Nb4-O7-Nb4  | 146.400  | 147.250  | 0.58  | 147.150  | 0.51  | O2-Nb2-O6   | 169.760  | 174.660  | 2.89  | 171.030  | 0.75  |
| Nb4-O9-Nb4  | 135.120  | 133.770  | -1.00 | 135.260  | 0.10  | O2-Nb4-O4   | 177.120  | 176.210  | -0.51 | 179.240  | 1.20  |
| O1-Nb1-O1   | 85.000   | 92.370   | 8.67  | 89.680   | 5.51  | O2-Nb4-O5   | 96.310   | 96.080   | -0.24 | 95.720   | -0.61 |
| O1-Nb1-O4   | 173.690  | 179.740  | 3.48  | 169.640  | -2.33 | O2-Nb4-O7   | 93.280   | 92.010   | -1.36 | 93.560   | 0.30  |
| O1-Nb1-O4   | 88.700   | 87.645   | -1.19 | 87.910   | -0.89 | O2-Nb4-O9   | 92.870   | 92.480   | -0.42 | 92.570   | -0.32 |
| O1-Nb4-O2   | 90.200   | 87.720   | -2.75 | 92.720   | 2.79  | O2-Pb3-O2   | 106.620  | 107.430  | 0.76  | 108.870  | 2.11  |
| O1-Nb4-O4   | 88.310   | 88.630   | 0.36  | 87.250   | -1.20 | O2-Pb3-O6   | 59.510   | 61.320   | 3.04  | 61.123   | 2.71  |
| O1-Nb4-O5   | 173.480  | 176.040  | 1.48  | 171.460  | -1.16 | O2-Pb3-O6   | 165.510  | 168.710  | 1.93  | 169.740  | 2.56  |
| O1-Nb4-O7   | 88.110   | 88.940   | 0.94  | 89.420   | 1.49  | O1-Pb5-O13  | 80.230   | 79.660   | -0.71 | 78.340   | -2.36 |
| O1-Nb4-O9   | 89.890   | 86.220   | -4.08 | 87.880   | -2.24 | O1-Pb5-O2   | 59.660   | 61.410   | 2.93  | 57.580   | -3.49 |
| O1-Pb1-O1   | 119.650  | 118.490  | -0.97 | 120.440  | 0.66  | O1-Pb5-O8   | 118.780  | 117.350  | -1.20 | 113.680  | -4.29 |
| O13-Pb1-O13 | 177.030  | 180.000  | 1.68  | 177.400  | 0.21  | O10-Nb3-O3  | 93.080   | 90.460   | -2.81 | 93.140   | 0.06  |
| O14-Pb3-O2  | 80.780   | 79.570   | -1.50 | 82.360   | 1.96  | O10-Nb3-O5  | 89.990   | 87.600   | -2.66 | 89.660   | -0.37 |
| O14-Pb3-O6  | 99.790   | 96.570   | -3.23 | 97.770   | -2.02 | O10-Nb3-O8  | 173.510  | 170.220  | -1.90 | 171.560  | -1.12 |
| O14-Pb3-O7  | 95.550   | 95.950   | 0.42  | 98.870   | 3.47  | O10-Pb4-O12 | 77.990   | 76.560   | -1.83 | 78.710   | 0.92  |
| O14-Pb5-O1  | 98.850   | 103.120  | 4.32  | 99.620   | 0.78  | O10-Pb4-O3  | 59.250   | 60.930   | 2.84  | 58.220   | -1.74 |
| O14-Pb5-O13 | 177.000  | 174.210  | -1.58 | 173.250  | -2.12 | O10-Pb4-O6  | 130.660  | 131.285  | 0.48  | 131.530  | 0.67  |
| O14-Pb5-O2  | 80.850   | 80.590   | -0.32 | 79.630   | -1.51 | O11-Nb1-O1  | 89.140   | 90.780   | 1.84  | 84.340   | -5.38 |
| O14-Pb5-O8  | 96.340   | 95.440   | -0.93 | 95.010   | -1.38 | O3-Pb2-O14  | 94.930   | 96.580   | 1.74  | 96.460   | 1.61  |
| O2-Nb2-O10  | 85.440   | 87.530   | 2.45  | 84.130   | -1.53 | O3-Pb2-O3   | 127.110  | 129.950  | 2.23  | 129.420  | 1.82  |

Table S<sub>6</sub>. Cont.

| Atoms      | XRD      | DFT-LDA  |       | DFT-GGA  |       | Atoms      | XRD      | DFT-LDA  |       | DFT-GGA  |        |
|------------|----------|----------|-------|----------|-------|------------|----------|----------|-------|----------|--------|
|            | Angle(°) | Angle(°) | Δ(%)  | Angle(°) | Δ(%)  |            | Angle(°) | Angle(°) | Δ(%)  | Angle(°) | Δ(%)   |
| O3-Pb2-O5  | 61.530   | 61.320   | -0.34 | 61.200   | -0.54 | O9-Nb4-O5  | 90.190   | 92.490   | 2.55  | 90.380   | 0.21   |
| O3-Pb2-O5  | 170.370  | 168.660  | -1.00 | 169.209  | -0.68 | O9-Nb4-O7  | 173.540  | 173.260  | -0.16 | 173.410  | -0.07  |
| O3-Pb2-O7  | 115.130  | 113.150  | -1.72 | 113.490  | -1.42 | O9-Pb1-O1  | 62.800   | 62.502   | -0.47 | 62.340   | -0.73  |
| O3-Pb4-O10 | 136.350  | 131.280  | -3.72 | 132.840  | -2.57 | O9-Pb1-O1  | 117.620  | 117.480  | -0.12 | 117.918  | 0.25   |
| O3-Pb4-O12 | 78.900   | 77.400   | -1.90 | 78.810   | -0.11 | O9-Pb1-O13 | 75.230   | 81.410   | 8.21  | 81.910   | 8.88   |
| O3-Pb4-O3  | 159.700  | 161.630  | 1.21  | 165.030  | 3.34  | O9-Pb1-O13 | 102.920  | 98.650   | -4.15 | 96.750   | -5.99  |
| O3-Pb4-O6  | 81.090   | 81.360   | 0.33  | 83.940   | 3.51  | O9-Pb1-O13 | 107.730  | 98.650   | -8.43 | 96.750   | -10.19 |
| O3-Pb4-O6  | 87.430   | 81.360   | -6.94 | 83.940   | -3.99 | O9-Pb1-O13 | 74.120   | 81.410   | 9.83  | 81.910   | 10.51  |
| O3-Pb4-O6  | 78.670   | 81.360   | 3.42  | 83.940   | 6.70  | O9-Pb1-O4  | 117.240  | 117.600  | 0.31  | 117.110  | -0.11  |
| O4-Nb1-O4  | 97.600   | 92.330   | -5.40 | 92.660   | -5.06 | O4-Nb4-O5  | 85.210   | 87.550   | 2.75  | 84.290   | -1.08  |
| O2-Pb3-O7  | 56.120   | 57.210   | 1.94  | 57.390   | 2.26  | O4-Nb4-O7  | 89.130   | 88.930   | -0.22 | 87.200   | -2.17  |
| O2-Pb5-O13 | 101.030  | 96.540   | -4.44 | 93.930   | -7.03 | O4-Pb1-O1  | 178.470  | 179.880  | 0.79  | 175.902  | -1.45  |
| O2-Pb5-O8  | 65.030   | 63.730   | -2.00 | 62.450   | -3.97 | O4-Pb1-O1  | 61.130   | 61.623   | 0.81  | 60.840   | -0.47  |
| O3-Nb3-O3  | 94.200   | 96.720   | 2.68  | 96.820   | 2.78  | O4-Pb1-O13 | 83.650   | 81.430   | -2.65 | 79.630   | -4.81  |
| O3-Nb3-O5  | 89.080   | 88.202   | -0.99 | 88.660   | -0.47 | O4-Pb1-O13 | 94.840   | 98.525   | 3.88  | 99.077   | 4.47   |
| O3-Nb3-O5  | 175.380  | 174.730  | -0.37 | 173.690  | -0.96 | O4-Pb1-O4  | 118.070  | 118.260  | 0.16  | 117.590  | -0.41  |
| O3-Nb3-O8  | 91.340   | 96.020   | 5.12  | 92.460   | 1.23  | O4-Pb5-O1  | 115.620  | 115.320  | -0.26 | 114.950  | -0.58  |
| O3-Pb2-O12 | 66.100   | 68.470   | 3.59  | 68.300   | 3.33  | O4-Pb5-O11 | 62.480   | 61.440   | -1.66 | 63.230   | 1.20   |
| O8-Nb2-O6  | 96.300   | 96.080   | -0.23 | 97.410   | 1.15  | O4-Pb5-O13 | 76.480   | 79.870   | 4.43  | 82.230   | 7.52   |
| O8-Pb5-O13 | 86.590   | 78.780   | -9.02 | 80.090   | -7.51 | O4-Pb5-O14 | 101.480  | 103.190  | 1.69  | 104.400  | 2.88   |
| O9-Nb4-O4  | 84.660   | 86.280   | 1.91  | 86.670   | 2.37  | O4-Pb5-O2  | 175.160  | 175.710  | 0.31  | 172.330  | -1.62  |

Table S<sub>6</sub>. Cont.

| Atoms      | XRD      | DFT-LDA  |       | DFT-GGA  |       | Atoms       | XRD      | DFT-LDA  |        | DFT-GGA  |        |
|------------|----------|----------|-------|----------|-------|-------------|----------|----------|--------|----------|--------|
|            | Angle(°) | Angle(°) | Δ(%)  | Angle(°) | Δ(%)  |             | Angle(°) | Angle(°) | Δ(%)   | Angle(°) | Δ(%)   |
| O4-Pb5-O5  | 61.810   | 61.500   | -0.50 | 64.340   | 4.09  | O6-Pb4-O12  | 97.660   | 95.031   | -2.69  | 96.630   | -1.05  |
| O4-Pb5-O8  | 118.610  | 117.470  | -0.96 | 122.960  | 3.67  | O6-Pb4-O3   | 112.730  | 116.273  | 3.14   | 110.710  | -1.79  |
| O5-Nb3-O5  | 87.470   | 86.820   | -0.74 | 85.700   | -2.02 | O9-Pb1-O4   | 62.280   | 62.418   | 0.22   | 62.342   | 0.10   |
| O5-Nb3-O8  | 85.330   | 85.300   | -0.04 | 84.160   | -1.37 | O9-Pb1-O9   | 178.150  | 180.000  | 1.04   | 178.660  | 0.29   |
| O5-Nb4-O7  | 91.100   | 92.040   | 1.03  | 91.410   | 0.34  | O6-Pb4-O6   | 165.960  | 161.630  | -2.61  | 166.510  | 0.33   |
| O5-Pb2-O12 | 119.200  | 120.150  | 0.80  | 119.270  | 0.06  | O7-Pb2-O12  | 172.980  | 171.830  | -0.66  | 171.020  | -1.13  |
| O5-Pb2-O14 | 79.240   | 79.530   | 0.37  | 79.110   | -0.16 | O7-Pb2-O14  | 96.380   | 95.930   | -0.47  | 95.830   | -0.57  |
| O5-Pb2-O5  | 109.530  | 107.380  | -1.96 | 108.130  | -1.28 | O8-Nb2-O10  | 167.980  | 170.220  | 1.33   | 170.130  | 1.28   |
| O5-Pb2-O7  | 58.550   | 57.200   | -2.31 | 57.750   | -1.37 | O8-Nb2-O2   | 85.640   | 85.370   | -0.32  | 88.610   | 3.47   |
| O5-Pb5-O1  | 177.170  | 175.750  | -0.80 | 177.620  | 0.25  | Pb1-O1-Pb5  | 84.800   | 88.820   | 4.74   | 84.940   | 0.17   |
| O5-Pb5-O11 | 117.640  | 117.220  | -0.36 | 121.700  | 3.45  | Pb1-O13-Pb1 | 121.620  | 107.760  | -11.40 | 108.140  | -11.08 |
| O5-Pb5-O13 | 99.970   | 96.750   | -3.22 | 99.280   | -0.69 | Pb1-O13-Pb5 | 110.320  | 109.860  | -0.42  | 108.290  | -1.84  |
| O5-Pb5-O14 | 80.810   | 80.660   | -0.19 | 82.760   | 2.41  | Pb1-O13-Pb5 | 107.440  | 109.860  | 2.25   | 108.290  | 0.79   |
| O5-Pb5-O2  | 122.930  | 121.590  | -1.09 | 123.040  | 0.09  | Pb1-O4-Nb1  | 107.840  | 105.300  | -2.36  | 105.170  | -2.48  |
| O5-Pb5-O8  | 64.040   | 63.760   | -0.44 | 65.810   | 2.76  | Pb1-O4-Nb4  | 105.940  | 105.030  | -0.86  | 104.000  | -1.83  |
| O6-Nb2-O10 | 91.100   | 90.400   | -0.77 | 89.080   | -2.22 | Pb1-O9-Nb4  | 104.370  | 106.190  | 1.74   | 104.540  | 0.16   |
| O6-Nb2-O2  | 85.950   | 88.200   | 2.62  | 88.470   | 2.93  | Pb1-O9-Nb4  | 107.110  | 106.190  | -0.86  | 104.540  | -2.40  |
| O6-Nb2-O6  | 103.770  | 96.740   | -6.77 | 97.300   | -6.23 | Pb1-O9-Pb1  | 89.030   | 89.560   | 0.60   | 89.300   | 0.30   |
| O6-Pb3-O6  | 133.870  | 129.900  | -2.97 | 128.760  | -3.82 | Pb2-O12-Pb4 | 109.300  | 109.410  | 0.10   | 108.710  | -0.54  |
| O6-Pb3-O7  | 109.560  | 113.180  | 3.30  | 112.640  | 2.81  | Pb2-O14-Pb5 | 110.390  | 111.360  | 0.88   | 108.980  | -1.28  |
| O6-Pb4-O10 | 59.870   | 60.920   | 1.75  | 58.350   | -2.54 | Pb2-O3-Nb3  | 110.670  | 113.360  | 2.43   | 113.120  | 2.21   |

Table S<sub>6</sub>. Cont.

| Atoms       | XRD      | DFT-LDA  |       | DFT-GGA  |       | Atoms       | XRD      | DFT-LDA  |       | DFT-GGA  |       |
|-------------|----------|----------|-------|----------|-------|-------------|----------|----------|-------|----------|-------|
|             | Angle(°) | Angle(°) | Δ(%)  | Angle(°) | Δ(%)  |             | Angle(°) | Angle(°) | Δ(%)  | Angle(°) | Δ(%)  |
| Pb2-O3-Pb4  | 84.730   | 85.650   | 1.09  | 87.020   | 2.70  | Pb4-O12-Pb4 | 120.260  | 120.690  | 0.36  | 121.230  | 0.81  |
| Pb2-O3-Pb4  | 103.430  | 103.151  | -0.27 | 103.433  | 0.00  | Pb4-O3-Nb3  | 141.670  | 135.860  | -4.10 | 137.460  | -2.97 |
| Pb2-O5-Nb3  | 98.500   | 97.120   | -1.40 | 96.910   | -1.61 | Pb4-O3-Pb4  | 95.960   | 98.650   | 2.80  | 96.600   | 0.67  |
| Pb2-O5-Nb4  | 105.570  | 107.480  | 1.81  | 106.100  | 0.50  | Pb4-O6-Pb3  | 89.660   | 85.660   | -4.46 | 88.740   | -1.03 |
| Pb2-O5-Pb5  | 89.560   | 88.440   | -1.25 | 89.100   | -0.51 | Pb4-O6-Pb4  | 95.510   | 98.640   | 3.28  | 97.020   | 1.58  |
| Pb2-O7-Nb4  | 103.740  | 102.530  | -1.17 | 103.550  | -0.18 | Pb5-O11-Pb5 | 87.710   | 84.880   | -3.23 | 85.910   | -2.05 |
| Pb2-O7-Pb3  | 82.170   | 79.230   | -3.58 | 80.560   | -1.96 | Pb5-O13-Pb5 | 96.820   | 109.320  | 12.91 | 108.540  | 12.10 |
| Pb3-O12-Pb2 | 93.330   | 95.590   | 2.42  | 95.130   | 1.93  | Pb5-O14-Pb5 | 102.690  | 97.750   | -4.81 | 99.330   | -3.27 |
| Pb3-O12-Pb4 | 110.650  | 109.420  | -1.11 | 109.950  | -0.63 | Pb5-O4-Nb1  | 102.690  | 104.570  | 1.83  | 110.970  | 8.06  |
| Pb3-O14-Pb2 | 109.750  | 112.640  | 2.63  | 114.140  | 4.00  | Pb5-O4-Nb4  | 102.030  | 102.040  | 0.01  | 101.970  | -0.06 |
| Pb3-O14-Pb5 | 111.720  | 111.420  | -0.27 | 112.190  | 0.42  | Pb5-O4-Pb1  | 88.930   | 88.830   | -0.11 | 89.810   | 0.99  |
| Pb3-O2-Pb5  | 86.530   | 88.410   | 2.17  | 85.820   | -0.82 | Pb5-O5-Nb3  | 104.530  | 104.080  | -0.43 | 107.440  | 2.78  |
| Pb3-O6-Pb4  | 99.100   | 103.180  | 4.12  | 101.990  | 2.92  | Pb5-O5-Nb4  | 110.880  | 108.840  | -1.84 | 109.350  | -1.38 |
| Pb3-O7-Nb4  | 101.270  | 102.560  | 1.27  | 101.220  | -0.05 | Pb5-O8-Pb5  | 89.990   | 93.120   | 3.48  | 90.680   | 0.77  |
| Pb4-O10-Pb4 | 83.690   | 86.180   | 2.98  | 81.330   | -2.82 |             |          |          |       |          |       |
